# Supplementary material for: Association between the Lymphotoxin‐α A252g Gene Polymorphism and the Risk of Sepsis and Mortality: A Meta‐Analysis
Source: Hindawi journal article supplement (doi:10.1155/2020/7936434), 2020-01-01

**Supplementary Table 1: Characteristics of case-control studies and distributions of LTA genotype and allele among sepsis patients and controls**

| Type               | Author                   | Year     | Country    | Ethnicity | Cases | Controls | Case |     |     | Control |     |     | Case |     | Control |     |
|--------------------|--------------------------|----------|------------|-----------|-------|----------|------|-----|-----|---------|-----|-----|------|-----|---------|-----|
|                    |                          |          |            |           |       |          | GG   | GA  | AA  | GG      | GA  | AA  | G    | A   | G       | A   |
| Sepsis             | Majetschak et al[12]     | 1999     | Germany    | Caucasian | 53    | 57       | 4    | 15  | 34  | 4       | 32  | 21  | 23   | 83  | 40      | 74  |
|                    | Waterer et al[15]        | 2001     | American   | Mixed     | 31    | 249      | 5    | 10  | 16  | 54      | 127 | 68  | 20   | 42  | 235     | 263 |
|                    | Majetschak et al[17]     | 2002     | Netherland | Caucasian | 14    | 56       | 4    | 1   | 9   | 8       | 26  | 22  | 9    | 19  | 42      | 70  |
|                    | Schaaf et al[18]         | 2003     | Germany    | Caucasian | 51    | 66       | 6    | 25  | 20  | 3       | 31  | 32  | 37   | 65  | 37      | 95  |
|                    | Calvano et al[19]        | 2003     | American   | Mixed     | 23    | 21       | 4    | 11  | 8   | 2       | 7   | 12  | 19   | 27  | 11      | 31  |
|                    | Zhang 1 et al[20]        | 2003     | China      | Asian     | 32    | 116      | 5    |     | 27  | 41      | 44  | 31  | NA   | NA  | 126     | 106 |
|                    | Zhang 2 et al[21]        | 2003     | China      | Asian     | 18    | 102      | 5    |     | 13  | 39      | 35  | 28  | NA   | NA  | 113     | 91  |
|                    | Balding et al[22]        | 2003     | Ireland    | Caucasian | 183   | 389      | 32   | 93  | 58  | 52      | 205 | 132 | 157  | 209 | 309     | 469 |
|                    | Riese et al[23]          | 2003     | Germany    | Caucasian | 18    | 154      | 2    | 1   | 15  | 22      | 54  | 78  | 5    | 31  | 98      | 210 |
|                    | Kahlke et al[24]         | 2004     | Germany    | Caucasian | 16    | 144      | 4    | 5   | 7   | 10      | 56  | 78  | 13   | 19  | 76      | 212 |
|                    | Gordon et al[25]         | 2004     | UK         | Caucasian | 213   | 348      | 27   | 94  | 92  | 50      | 166 | 132 | 148  | 278 | 266     | 430 |
|                    | Nakada et al[26]         | 2005     | Japan      | Asian     | 86    | 325      | 10   | 51  | 25  | 50      | 162 | 113 | 71   | 101 | 262     | 388 |
|                    | Watanabe et al[27]       | 2005     | Japan      | Asian     | 68    | 150      | 20   |     | 48  | 50      |     | 100 | NA   | NA  | NA      | NA  |
|                    | Schueller et al[28]      | 2006     | Germany    | Caucasian | 67    | 102      | 10   | 26  | 31  | 18      | 39  | 45  | 46   | 88  | 75      | 129 |
|                    | Garnacho et al[29]       | 2006     | Spain      | Caucasian | 224   | 101      | 16   | 69  | 139 | 10      | 34  | 57  | 101  | 347 | 54      | 148 |
|                    | García-Segarra et al[30] | 2007     | Spain      | Caucasian | 165   | 139      | 17   | 54  | 94  | 15      | 56  | 68  | 88   | 242 | 86      | 192 |
|                    | Menges 1 et al[31]       | 2008     | Germany    | Caucasian | 70    | 83       |      | 46  | 24  |         | 41  | 42  | NA   | NA  | NA      | NA  |
|                    | Menges 2 et al[31]       | 2008     | Germany    | Caucasian | 17    | 59       |      | 14  | 3   |         | 31  | 28  | NA   | NA  | NA      | NA  |
|                    | Read et al[32]           | 2009     | UK         | Mixed     | 442   | 850      | 169  | 210 | 63  | 334     | 393 | 123 | 548  | 336 | 1061    | 639 |
|                    | Carregaro et al[33]      | 2010     | Brasil     | Mixed     | 97    | 165      | 6    | 39  | 52  | 20      | 60  | 85  | 51   | 143 | 100     | 230 |
| Gu et al[34]       | 2010                     | China    | Asian      | 130       | 176   | 39       | 67   | 24  | 55  | 93      | 28  | 145 | 115  | 203 | 149     |     |
| Watanabe et al[35] | 2010                     | American | Mixed      | 838       | 852   | 112      | 335  | 391 | 151 | 362     | 339 | 559 | 1117 | 664 | 1040    |     |

|              |                          | Sole-Violan et al[36] | 2010     | Spain     | Caucasian | 1120     | 1228         | 83   | 471 | 566      | 96      | 511 | 621          | 637  | 1603     | 703     | 1753 |
|--------------|--------------------------|-----------------------|----------|-----------|-----------|----------|--------------|------|-----|----------|---------|-----|--------------|------|----------|---------|------|
|              |                          |                       |          |           |           |          |              | Case |     |          | Control |     |              | Case |          | Control |      |
| Type         | Author                   | Year                  | Country  | Ethnicity | Cases     | Controls | GG           | GA   | AA  | GG       | GA      | AA  | G            | A    | G        | A       |      |
| Sepsis       | Song et al[37]           | 2012                  | China    | Asian     | 786       | 599      | 181          | 362  | 243 | 155      | 266     | 178 | 724          | 848  | 576      | 622     |      |
|              | Azevedo et al[38]        | 2012                  | Brazil   | Mixed     | 400       | 323      | 69           | 184  | 147 | 41       | 150     | 132 | 322          | 478  | 232      | 414     |      |
|              | Baghel et al[39]         | 2014                  | Indian   | Asian     | 46        | 165      | 5            | 11   | 30  | 20       | 76      | 69  | 21           | 71   | 116      | 214     |      |
|              | Montoya-Ruiz et al[40]   | 2016                  | American | Caucasian | 415       | 205      | 57           | 185  | 173 | 19       | 86      | 100 | 299          | 531  | 124      | 286     |      |
| Septic Shock | Schaaf et al[18]         | 2003                  | Germany  | Caucasian | 13        | 66       | 0            | 7    | 6   | 3        | 31      | 32  | 7            | 19   | 37       | 95      |      |
|              | Calvano et al[19]        | 2003                  | American | Mixed     | 5         | 21       | 2            | 1    | 2   | 2        | 7       | 12  | 5            | 5    | 11       | 31      |      |
|              | Zhang 1 et al[20]        | 2003                  | China    | Asian     | 32        | 116      | 5            | 27   |     | 41       | 44      | 31  | NA           | NA   | 126      | 106     |      |
|              | Zhang 2 et al[21]        | 2003                  | China    | Asian     | 18        | 102      | 5            | 13   |     | 39       | 35      | 28  | NA           | NA   | 113      | 91      |      |
|              | Watanabe et al[27]       | 2005                  | Japan    | Asin      | 41        | 282      | 14           | 27   |     | 93       | 189     |     | NA           | NA   | NA       | NA      |      |
|              | Garnacho et al[29]       | 2006                  | Spain    | Caucasian | 114       | 101      | 45           | 69   |     | 10       | 34      | 57  | NA           | NA   | 54       | 148     |      |
|              | García-Segarra et al[30] | 2007                  | Spain    | Caucasian | 88        | 139      | 8            | 26   | 54  | 15       | 56      | 68  | 42           | 134  | 86       | 192     |      |
|              | Sole-Violan et al[36]    | 2010                  | Spain    | Caucasian | 159       | 1228     | 8            | 64   | 87  | 96       | 511     | 621 | 80           | 238  | 703      | 1753    |      |
|              | Azevedo et al[38]        | 2012                  | Brazil   | Mixed     | 254       | 323      | 43           | 115  | 96  | 41       | 150     | 132 | 201          | 307  | 232      | 414     |      |
| Mortality    |                          |                       |          |           |           |          | Non-survivor |      |     | Survivor |         |     | Non-survivor |      | Survivor |         |      |
|              |                          | Stuber et al[9]       | 1995     | Germany   | Caucasian | 41       | 39           | 4    | 15  | 22       | 9       | 22  | 8            | 23   | 59       | 40      | 38   |
|              |                          | Stuber et al[10]      | 1996     | Germany   | Caucasian | 23       | 17           | 1    | 7   | 15       | 3       | 12  | 2            | 9    | 37       | 18      | 16   |
|              |                          | Fang et al[11]        | 1999     | Germany   | Caucasian | 47       | 46           | 2    | 20  | 25       | 10      | 30  | 6            | 24   | 70       | 50      | 42   |
|              |                          | Majetschak et al[12]  | 1999     | Germany   | Caucasian | 21       | 32           | 1    | 7   | 13       | 3       | 8   | 21           | 9    | 33       | 14      | 50   |
|              |                          | Schroder et al[13]    | 1999     | Germany   | Caucasian | 40       | 47           | 3    | 17  | 20       | 10      | 29  | 8            | 23   | 57       | 49      | 45   |
|              |                          | Schroeder et al[14]   | 2000     | Germany   | Caucasian | 106      | 95           | 8    | 37  | 61       | 12      | 51  | 32           | 53   | 159      | 75      | 115  |
|              |                          | Waterer et al[15]     | 2001     | American  | Mixed     | 15       | 16           | 2    | 5   | 8        | 3       | 5   | 8            | 9    | 21       | 11      | 21   |

| Rauchschwalbe et al[16]                                 |                          |      |          |           |       |          |              |    |    |          |     |     |              |     |          |      |    |
|---------------------------------------------------------|--------------------------|------|----------|-----------|-------|----------|--------------|----|----|----------|-----|-----|--------------|-----|----------|------|----|
| 2002 Germany Caucasian 21 58 1 11 9 3 26 29 13 29 32 84 |                          |      |          |           |       |          |              |    |    |          |     |     |              |     |          |      |    |
| Type                                                    | Author                   | Year | Country  | Ethnicity | Cases | Controls | Non-survivor |    |    | Survivor |     |     | Non-survivor |     | Survivor |      |    |
|                                                         |                          |      |          |           |       |          | GG           | GA | AA | GG       | GA  | AA  | G            | A   | G        | A    |    |
| Mortality                                               | Calvano et al[19]        | 2003 | American | Mixed     | 8     | 15       | 3            | 3  | 2  | 1        | 8   | 6   | 9            | 7   | 10       | 20   |    |
|                                                         | Balding et al[22]        | 2003 | Ireland  | Caucasian | 25    | 158      | 3            | 14 | 8  | 29       | 79  | 50  | 20           | 30  | 137      | 179  |    |
|                                                         | Kahlke et al[24]         | 2004 | Germany  | Caucasian | 6     | 10       | 0            | 1  | 5  | 4        | 4   | 2   | 1            | 11  | 12       | 8    |    |
|                                                         | Gordon et al[25]         | 2004 | UK       | Caucasian | 52    | 161      | 5            | 22 | 25 | 22       | 72  | 67  | 32           | 72  | 116      | 206  |    |
|                                                         | Nakada et al[26]         | 2005 | Japan    | Asian     | 22    | 64       | 5            | 12 | 5  | 5        | 39  | 20  | 22           | 22  | 49       | 79   |    |
|                                                         | Watanabe et al[27]       | 2005 | Japan    | Asian     | 36    | 77       | 9            |    | 27 | 24       |     | 53  | NA           | NA  | NA       | NA   |    |
|                                                         | Garnacho et al[29]       | 2006 | Spain    | Caucasian | 52    | 172      |              | 17 |    | 35       | 68  |     | 104          | NA  | NA       | NA   | NA |
|                                                         | García-Segarra et al[30] | 2007 | Spain    | Caucasian | 24    | 64       |              | 4  |    | 20       | 30  |     | 34           | NA  | NA       | NA   | NA |
|                                                         | Read et al[32]           | 2009 | UK       | Mixed     | 48    | 394      | 12           | 27 | 9  | 157      | 183 | 54  | 51           | 45  | 497      | 291  |    |
|                                                         | Sole-Violan et al[36]    | 2010 | Spain    | Caucasian | 79    | 1041     | 5            | 35 | 39 | 78       | 436 | 527 | 45           | 113 | 592      | 1490 |    |
|                                                         | Song et al[37]           | 2012 | China    | Asian     | 155   | 261      | 35           | 62 | 58 | 60       | 119 | 82  | 132          | 178 | 239      | 283  |    |
|                                                         | Azevedo et al[38]        | 2012 | Brazil   | Mixed     | 37    | 363      | 9            | 12 | 16 | 60       | 172 | 131 | 30           | 44  | 292      | 434  |    |
|                                                         | Baghel et al[39]         | 2014 | Indian   | Asian     | 8     | 38       | 0            |    | 8  | 5        |     | 33  | NA           | NA  | NA       | NA   |    |

NA: not available

---

### Supplementary Figure 1. Flow Chart of study inclusion

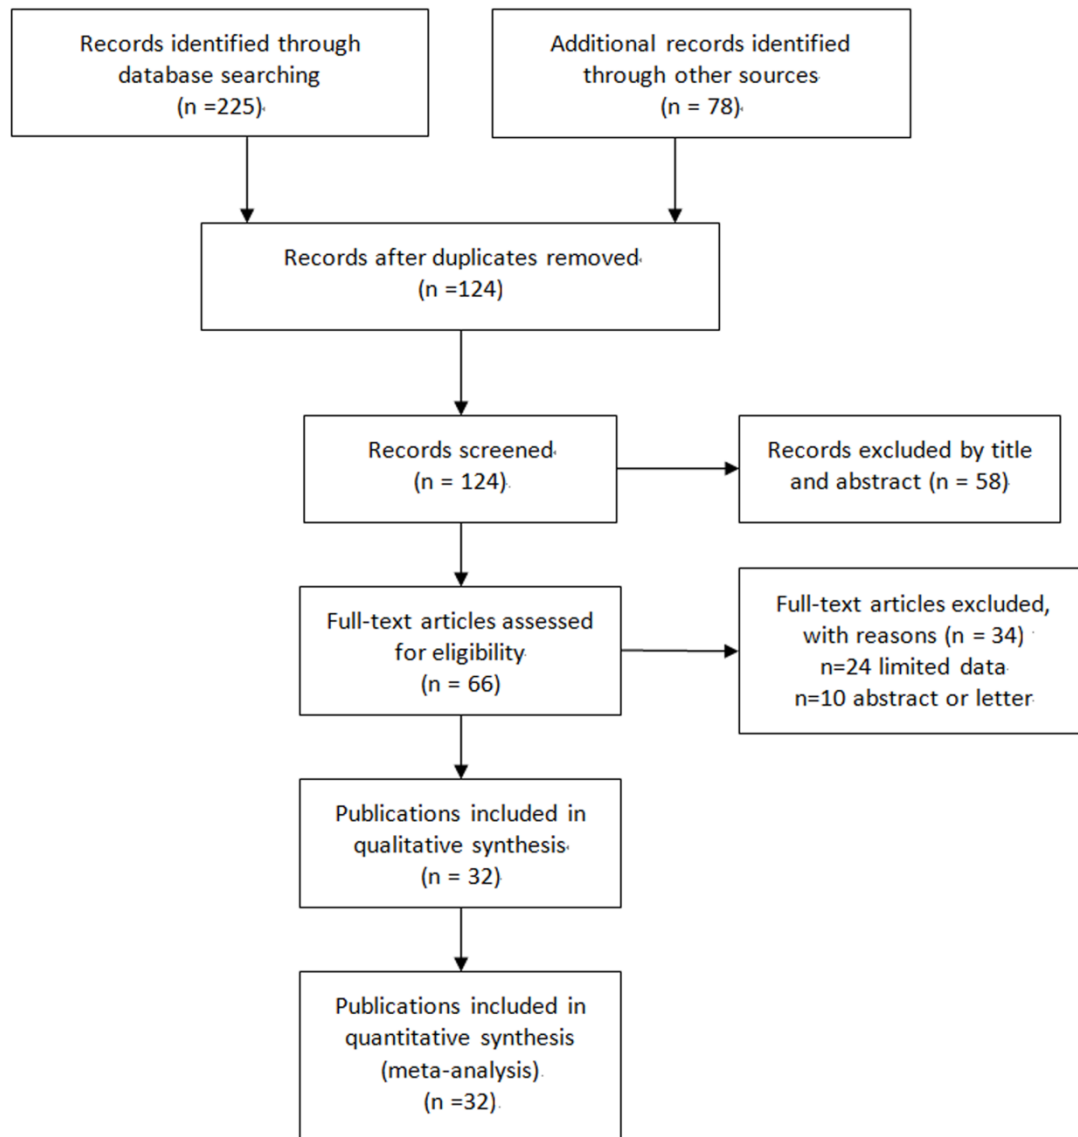

Supplement: f1 [file 7936434.f1.pdf]
